# Supplementary material for: Efficient pan-European river flood hazard modelling through a combination of statistical and physical models
Source: Copernicus journal article supplement (doi:10.5194/nhess-17-1267-2017), 2017-07-21
Supplement: Supplementary file 1 [file nhess-17-1267-2017-supplement.zip]

Archive with 3 entries (3 files):
- SI1-1.png
- SI1-2.png
- nhess-17-1267-2017-supplement-title-page.pdf
