# Supplementary material for: Efficient pan-European river flood hazard modelling through a combination of statistical and physical models
Source: Copernicus journal article supplement (doi:10.5194/nhess-17-1267-2017), 2017-07-21
Supplement: Supplementary file 1 [file nhess-17-1267-2017-supplement.zip › nhess-17-1267-2017-supplement-title-page.pdf]

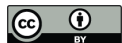

*Supplement of*

**Efficient pan-European river flood hazard modelling through a combination of statistical and physical models**

**Dominik Paprotny et al.**

*Correspondence to:* Dominik Paprotny (d.paprotny@tudelft.nl)

- nhess-17-1267-2017-supplement-title-page.pdf
- SI1-1.png
- SI1-2.png

The copyright of individual parts of the supplement might differ from the CC BY 3.0 License.
