# Supplementary figures and images for: Efficient pan-European river flood hazard modelling through a combination of statistical and physical models
Source: Copernicus journal article supplement (doi:10.5194/nhess-17-1267-2017), 2017-07-21

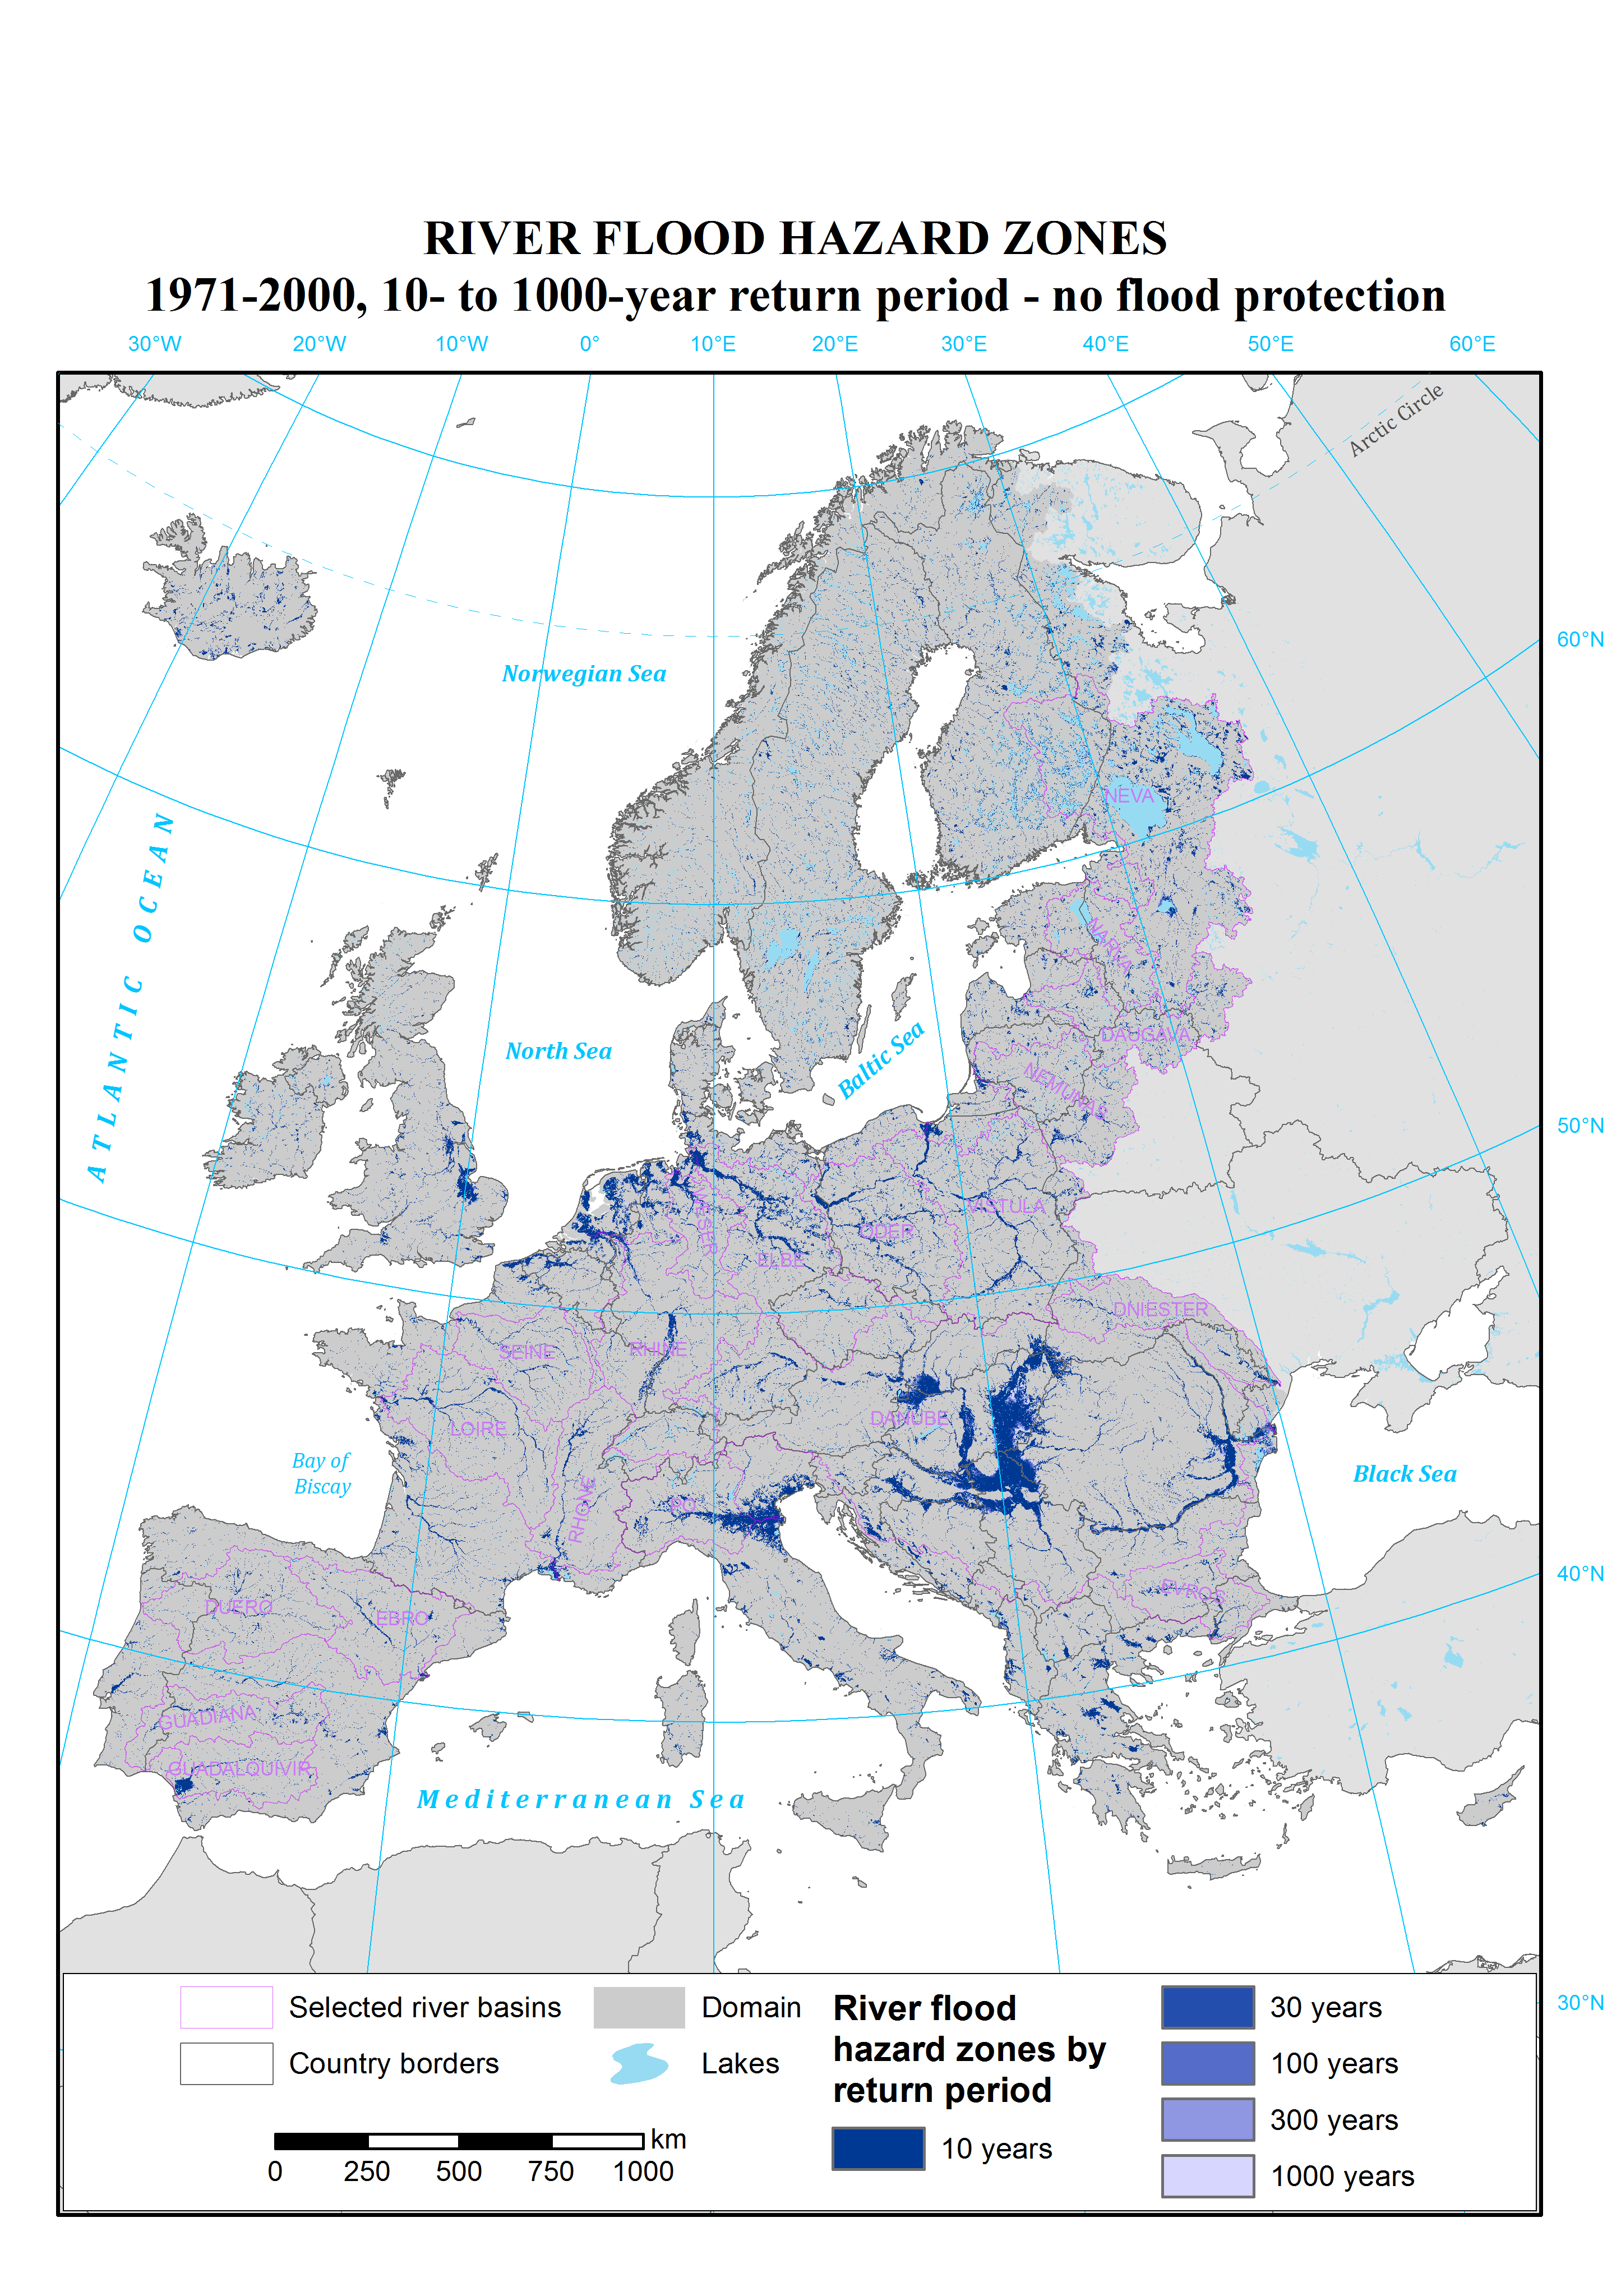

Supplement: Supplementary file 1 [file nhess-17-1267-2017-supplement.zip › SI1-1.png]

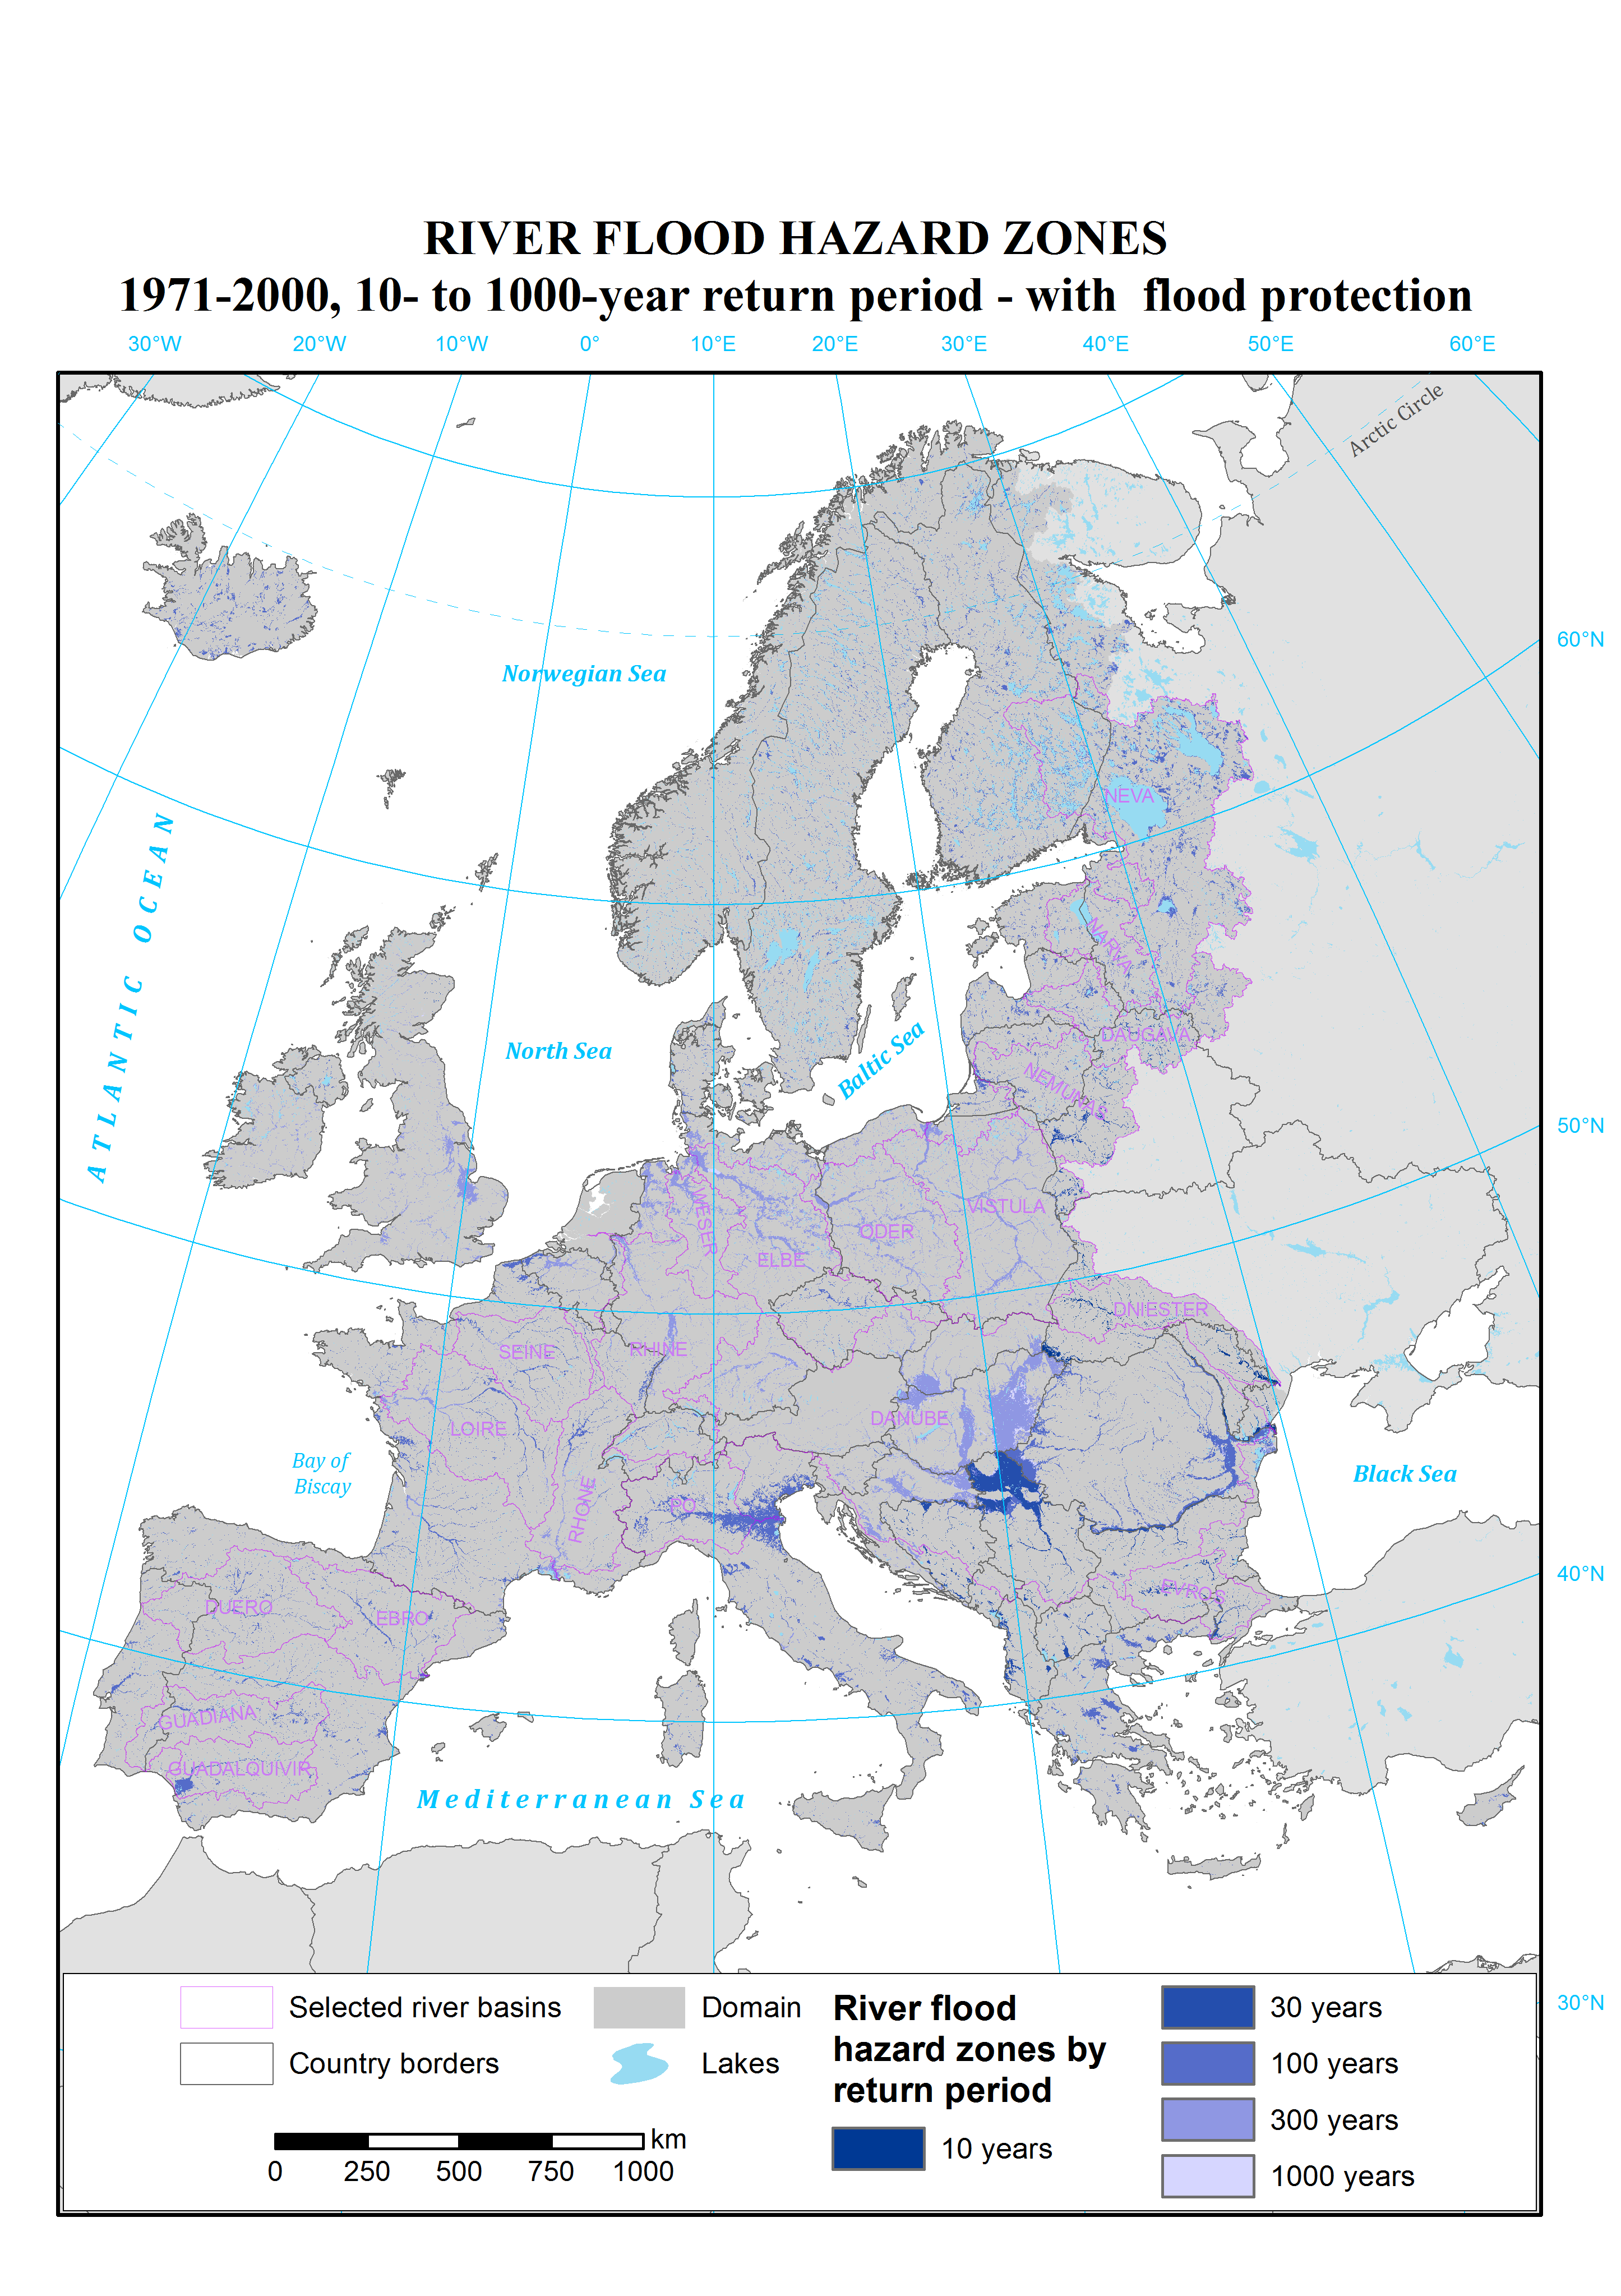

Supplement: Supplementary file 1 [file nhess-17-1267-2017-supplement.zip › SI1-2.png]
